# Supplementary material for: Large-diameter and heteroatom-doped graphene nanotubes decorated with transition metals as carbon hosts for lithium–sulfur batteries
Source: Royal Society of Chemistry journal article supplement (doi:10.1039/c9ta02889g), 2019-01-01
Supplement: c9ta02889g1.pdf [file c9ta02889g1.pdf]

## Supporting Information

### **Large-diameter and Heteroatom-doped Graphene Nanotubes Decorated with Transition Metals as Carbon Hosts for Lithium-Sulfur Batteries**

Ogechi Ogoke<sup>a,1</sup>, Sooyeon Hwang<sup>b,1</sup>, Benjamin Hultman<sup>a</sup>, Mengjie Chen<sup>a</sup>, Stavros Karakalos<sup>c</sup>  
Yanghua He<sup>a</sup>, Adam Ramsey<sup>a</sup>, Dong Su<sup>b,\*</sup>, Paschalis Alexandridis<sup>a,\*</sup>, and Gang Wu<sup>a,\*</sup>

<sup>a</sup>Department of Chemical and Biological Engineering, University at Buffalo, The State  
University of New York, Buffalo, NY 14260, United States  
Email: [gangwu@buffalo.edu](mailto:gangwu@buffalo.edu) (G. Wu) and [palexand@buffalo.edu](mailto:palexand@buffalo.edu) (P. Alexandridis)

<sup>b</sup>Center for Functional Nanomaterials, Brookhaven National Laboratory, Upton, NY 11973,  
United States  
Email: [dsu@bnl.gov](mailto:dsu@bnl.gov) (D. Su)

<sup>c</sup>Department of Chemical Engineering, University of South Carolina, Columbia, SC 29208,  
United States

<sup>1</sup>, These authors contributed equally

**Figures S1 to S16**

**Tables S1 to S2**

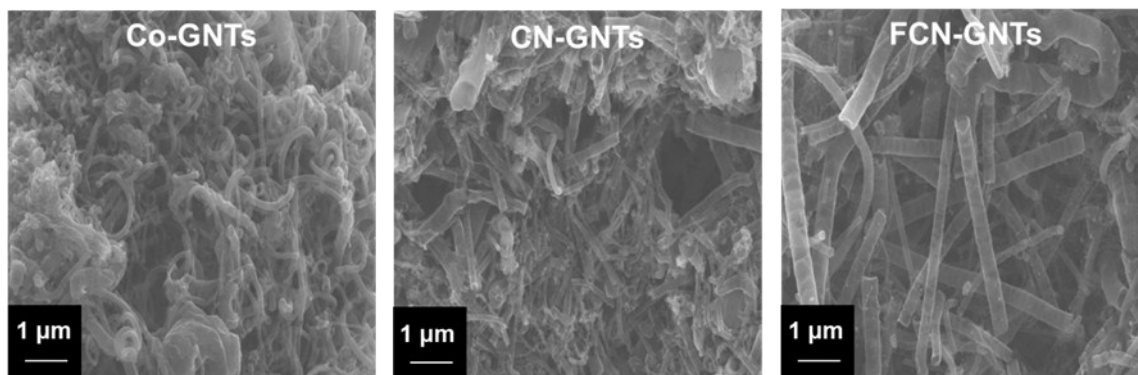

**Figure S1.** SEM images of each heteroatom doped graphene nanotube samples. Cobalt doped graphene nanotubes (CO-GNTs), cobalt-nickel doped graphene nanotubes (CN-GNTs), and iron-cobalt-nickel doped graphene nanotubes (FCN-GNTs) respectively.

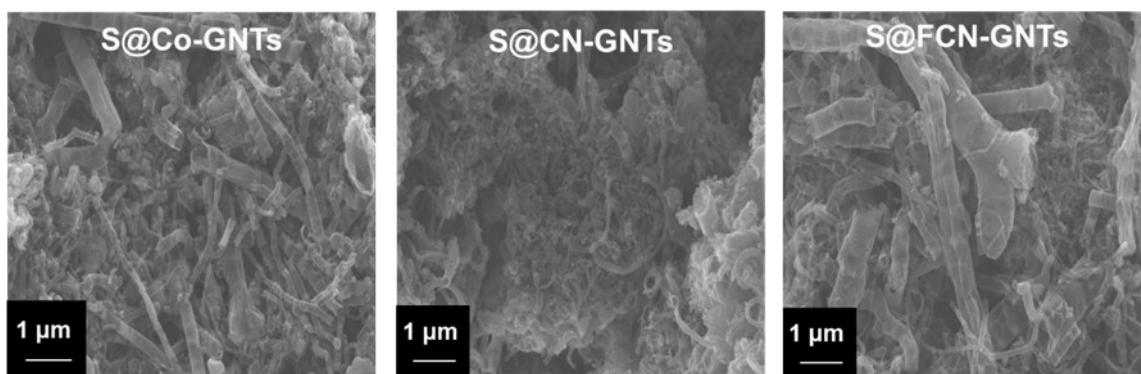

**Figure S2.** SEM images of sulfur infused heteroatom doped graphene nanotube samples. Sulfur infused cobalt-nickel doped graphene nanotubes S@CO-GNTs, sulfur infused cobalt-nickel doped graphene nanotubes S@CN-GNTs, and sulfur infused iron-cobalt-nickel doped graphene nanotubes S@FCN-GNTs

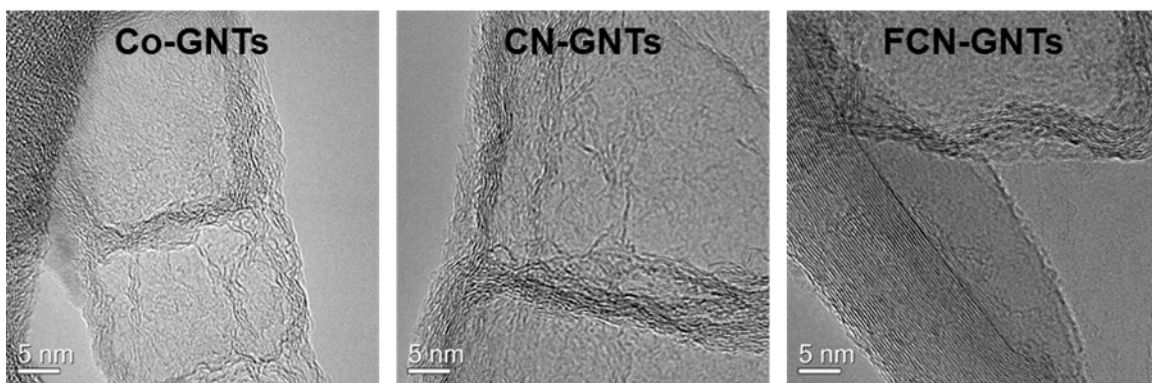

**Figure S3.** HRTEM images of Co-GNTs, CN-GNTs, and FCN-GNTs. The scale bars are 5 nm.

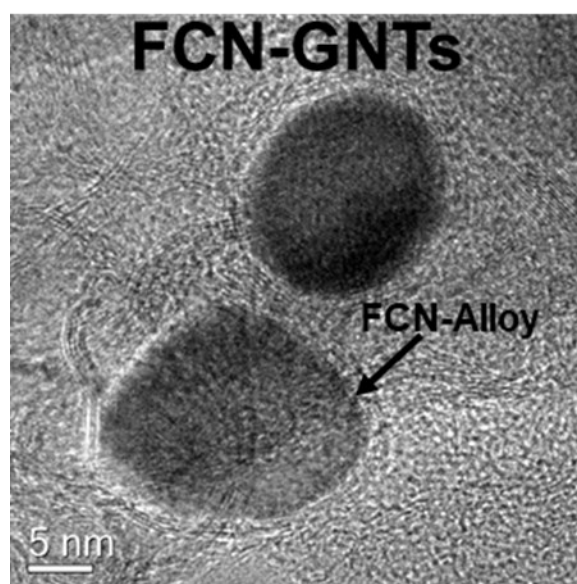

**Figure S4.** HRTEM image of the FCN-alloy decorated graphene nanotubes (FCN-GNTs). The particle size is roughly 10-20 nm. The scale bar is 5 nm.

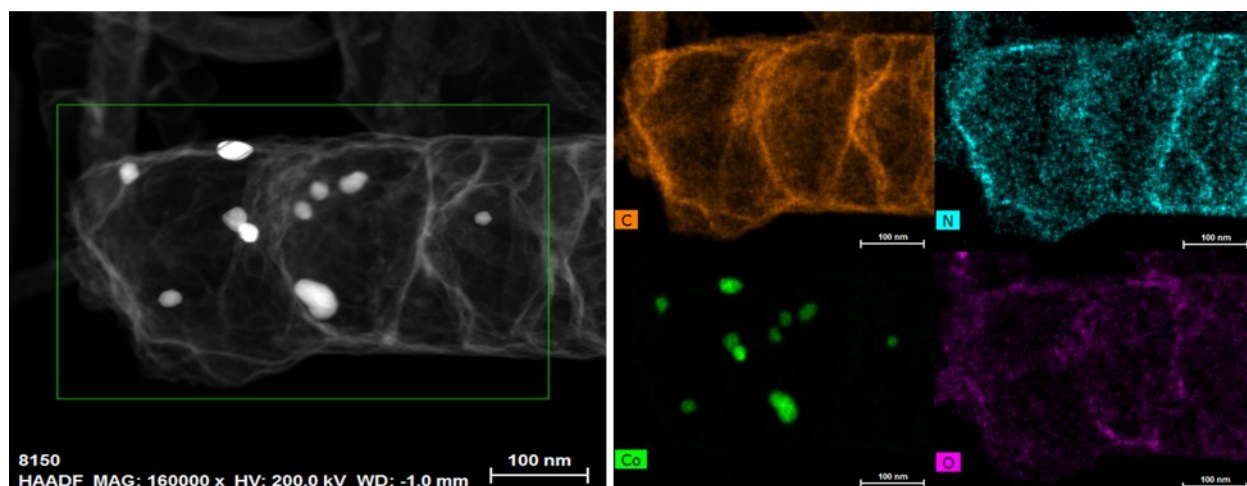

**Figure S5.** STEM and elemental mapping for Co-GNTs, showing uniform nitrogen doping and decorated Co particles.

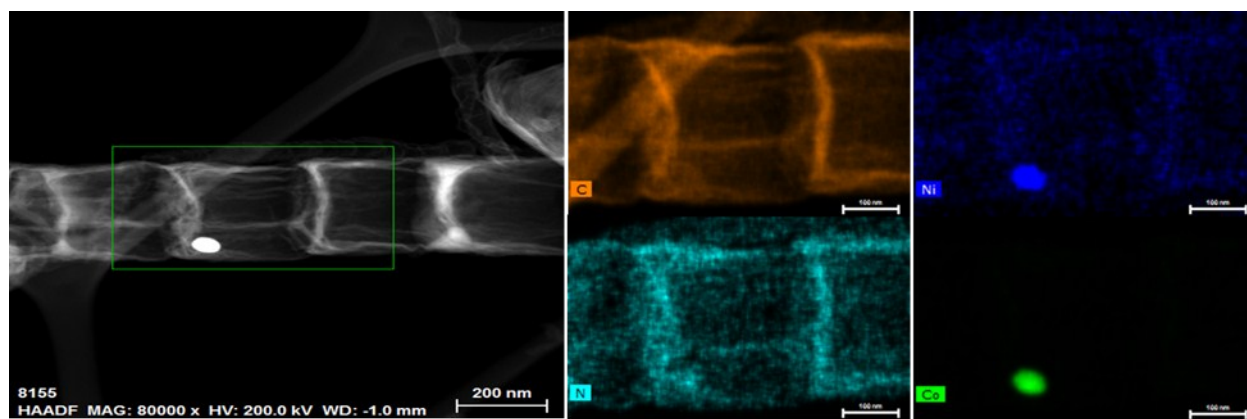

**Figure S6.** STEM and elemental mapping for CoNi-GNTs, showing uniform nitrogen doping and decorated CoNi alloy particles.

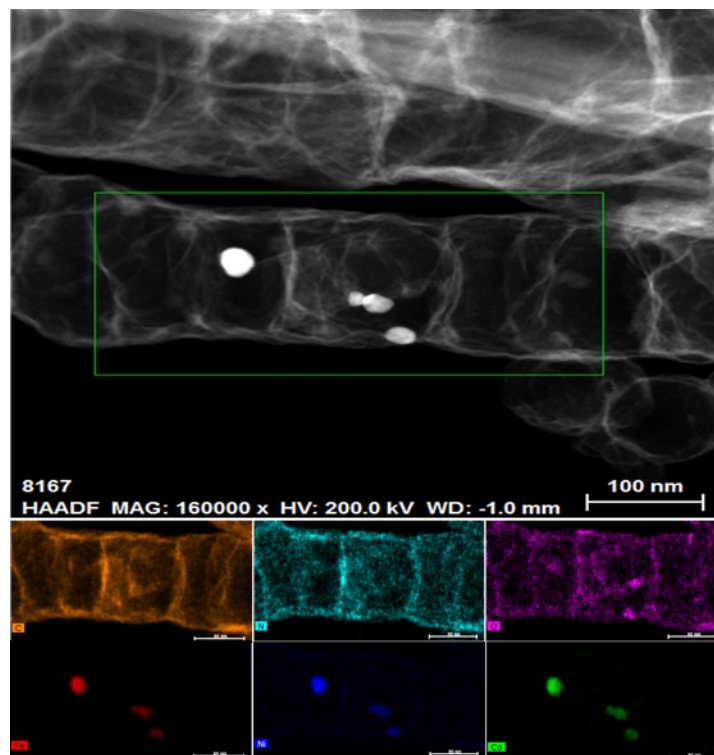

**Figure S7.** STEM and elemental mapping for FeCoNi-GNTs, showing uniform nitrogen doping and decorated FeCoNi alloy particles.

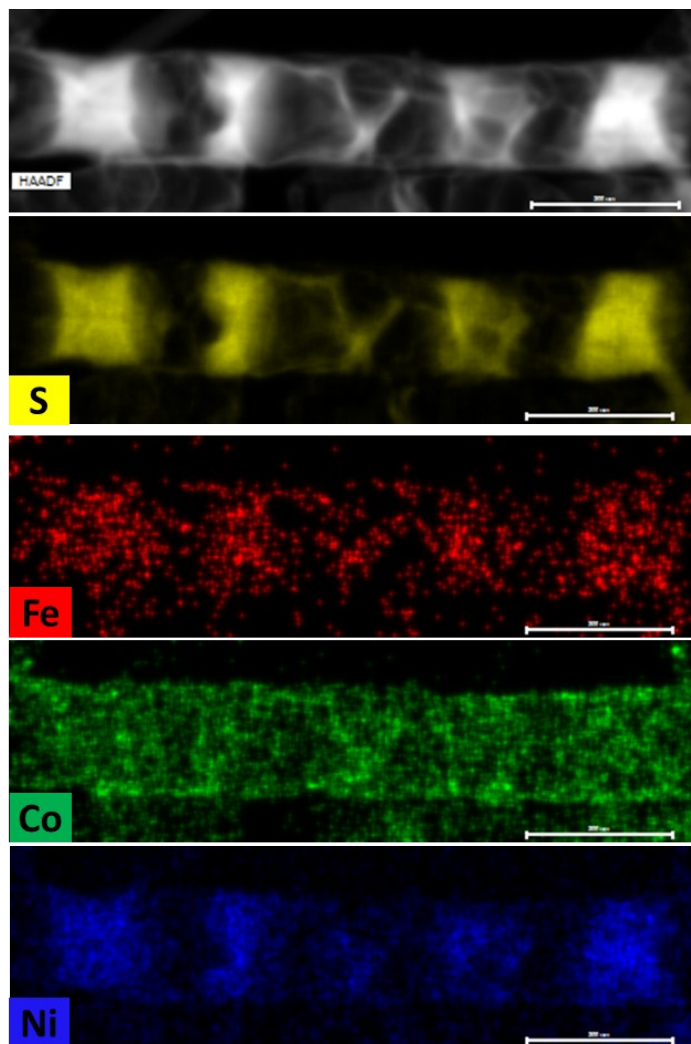

**Figure S8.** Atomically dispersed atomic metal sites in graphene tubes, which are likely associated with adsorbed S.

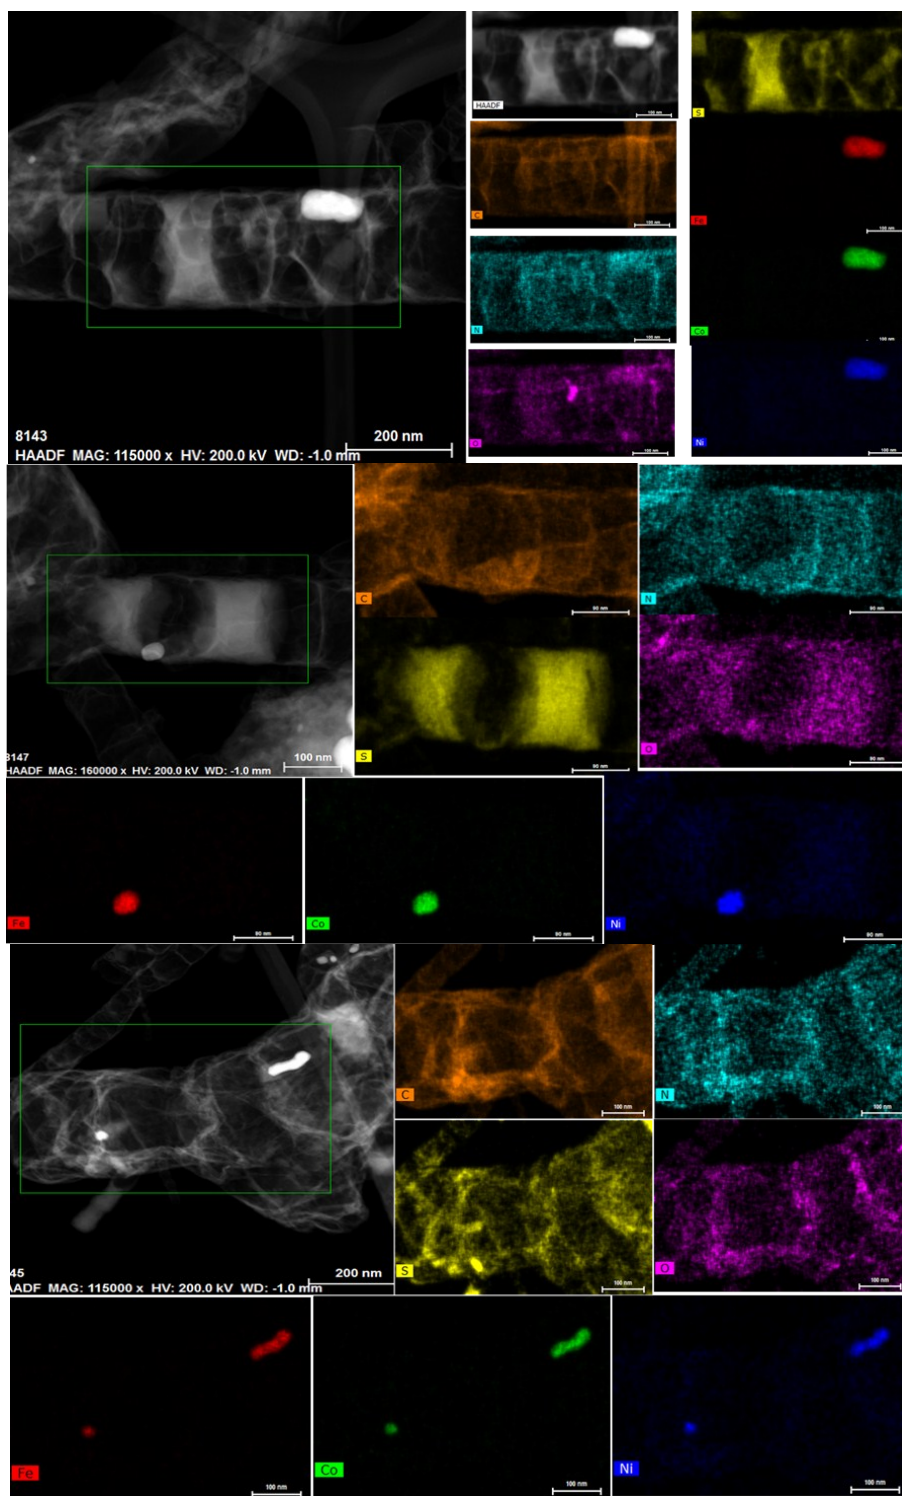

**Figure S9.** STEM and elemental EDX mapping for S@FeCoNi-GNTs containing S inside the tubes. The green line highlighted region is elementally analyzed. The carbon (orange) tube-structure is visible with N (turquoise) and O (pink) doping present throughout. Sulfur (yellow) has

diffused, via melting, into the tube-structure which allows for excellent contact with the carbon hosts structure.

**Table S1.** Representative elemental content for the S@FeCoNi-GNT carbon. The actual ratios among F, Co, and Ni are close to the nominated 1: 1: 1

|    | Atomic % |
|----|----------|
| Fe | 0.37     |
| Co | 0.55     |
| Ni | 0.68     |
| C  | 72.81    |
| N  | 4.69     |
| O  | 3.01     |
| S  | 17.88    |

|    | Atomic % |
|----|----------|
| Fe | 23.17    |
| Co | 34.31    |
| Ni | 42.52    |



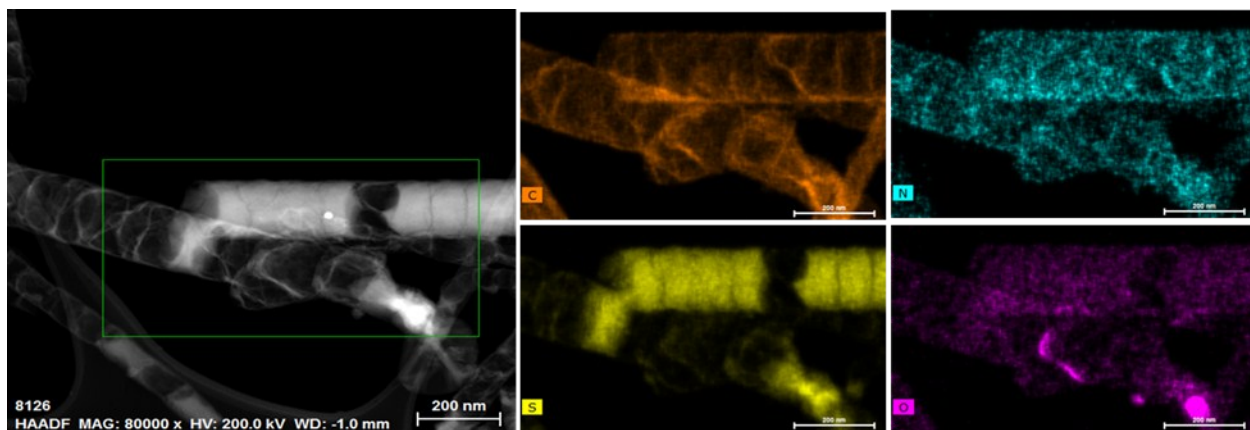

**Figure S10.** STEM and elemental EDX mapping for S@Co-GNTs containing S inside the tubes. The green line highlighted region is elementally analyzed. The carbon (orange) tube-structure is visible with N (turquoise) and O (pink) doping present throughout. Sulfur (yellow) has diffused, via melting, into the tube-structure which allows for excellent contact with the carbon hosts structure.

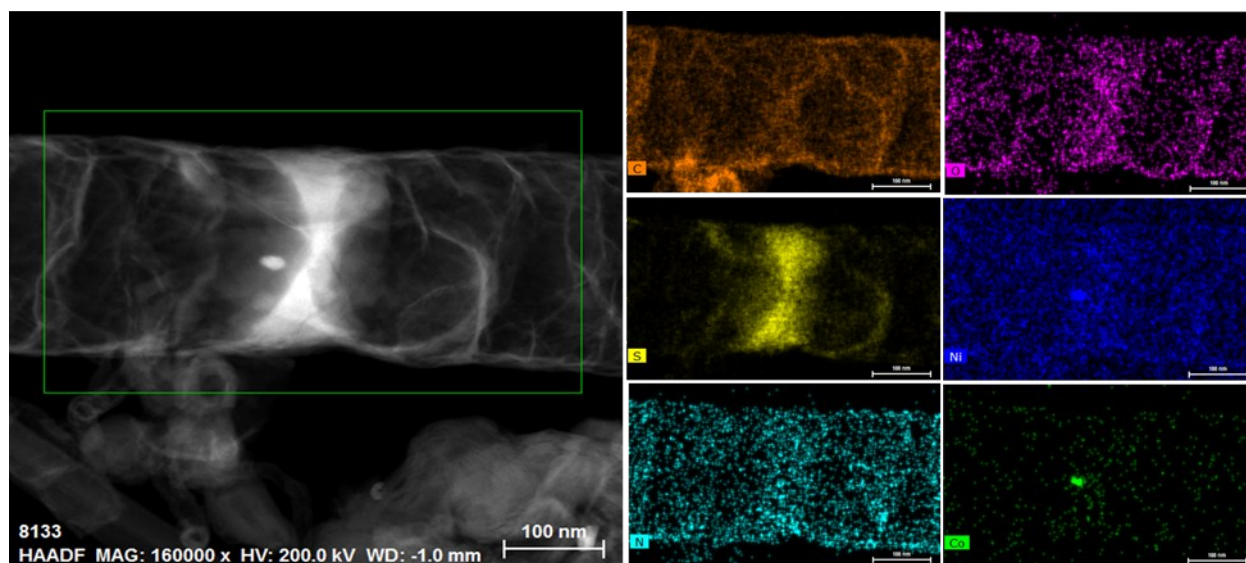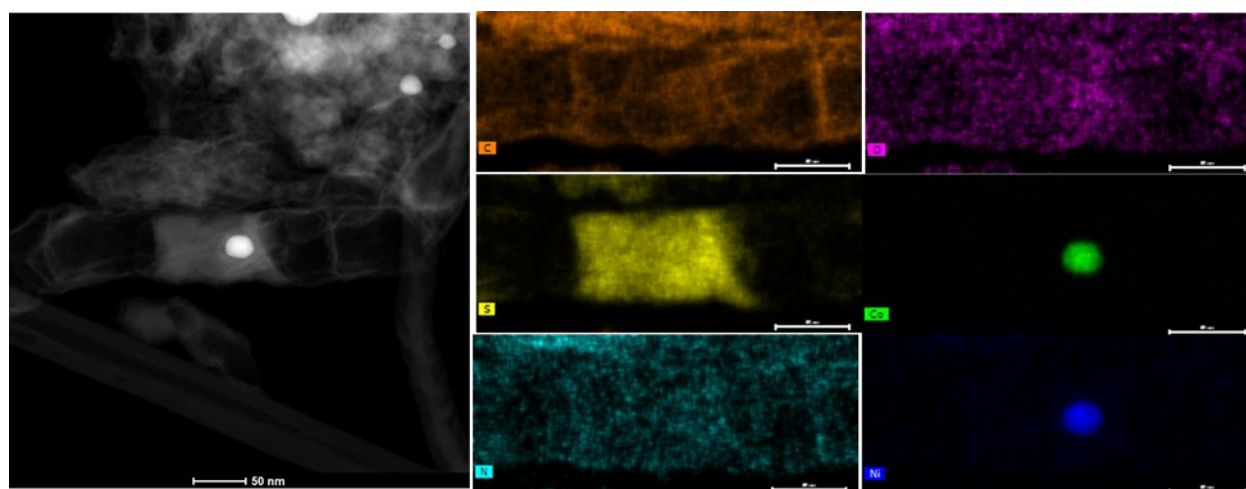

**Figure S11.** STEM and elemental EDX mapping for S@CoNi-GNTs containing S inside the tubes. The green line highlighted region is elementally analyzed. The carbon (orange) tube-structure is visible with N (turquoise) and O (pink) doping present throughout. Sulfur (yellow) has diffused, via melting, into the tube-structure which allows for excellent contact with the carbon hosts structure.

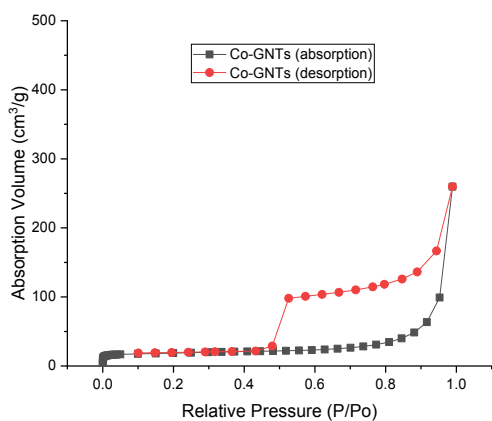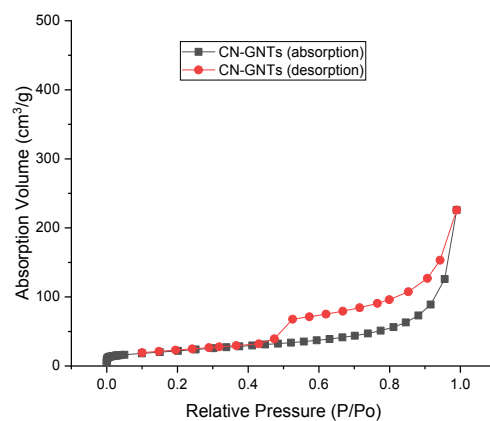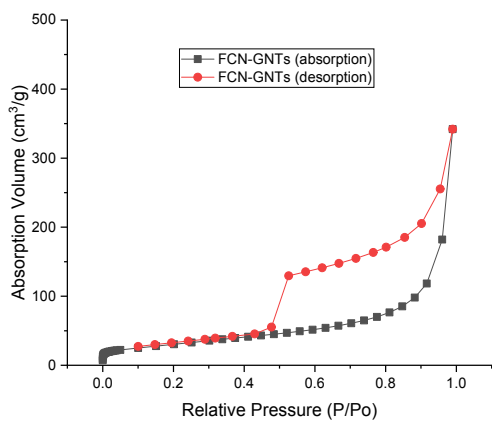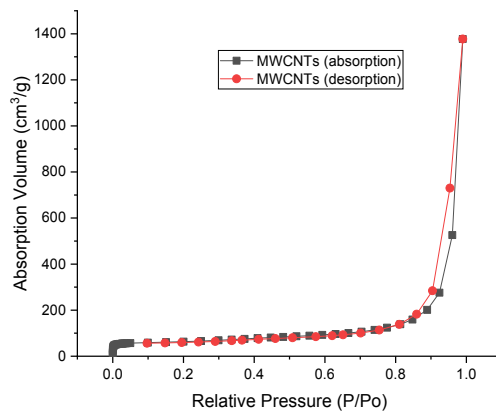

**Figure S12.** The N<sub>2</sub> adsorption and desorption isotherms of Co-GNTs, CN-GNTs, FCN-GNTs, and MWCNTs.

**Table S2.** Elemental qualification of M-GNTs determined by XPS.

| at.%       | C    | N   | O   | Co  | Ni  | Fe  |
|------------|------|-----|-----|-----|-----|-----|
| Co-GNT     | 93.8 | 4.1 | 1.6 | 0.5 | -   | -   |
| CoNi-GNT   | 92.9 | 4.5 | 1.5 | 0.3 | 0.8 | -   |
| FeCoNi-GNT | 91.8 | 5.4 | 1.6 | 0.3 | 0.8 | 0.1 |

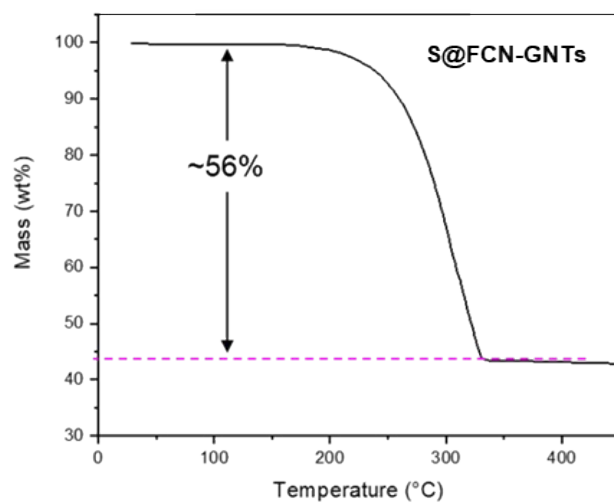

**Figure S13.** TGA of the S@FCN-GNTs material.

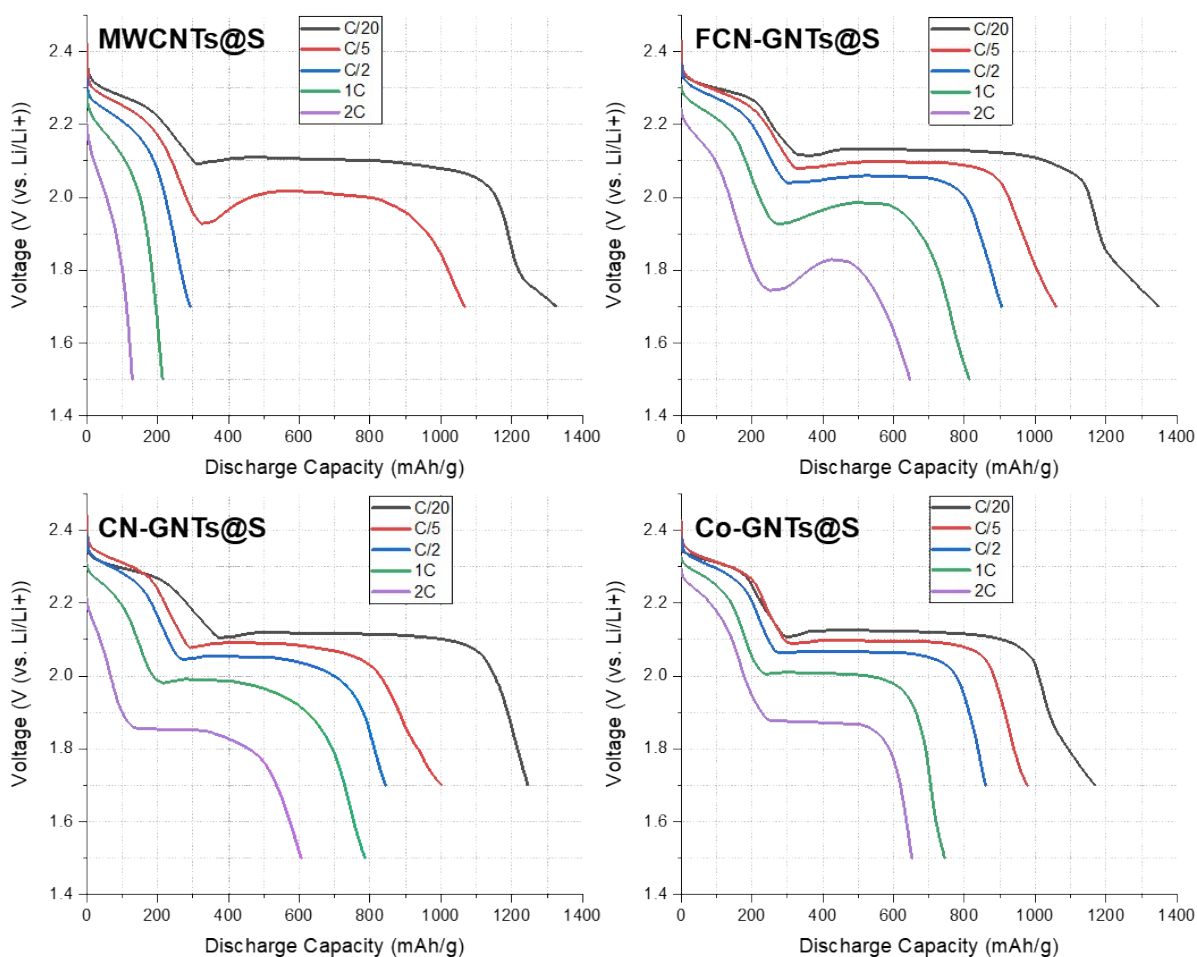

**Figure S14.** The C/20, C/5, C/2, 1C, and 2C voltage profiles of S@MWCNTs, S@Co-GNTs, S@CN-GNTs, and S@FCN-GNTs.

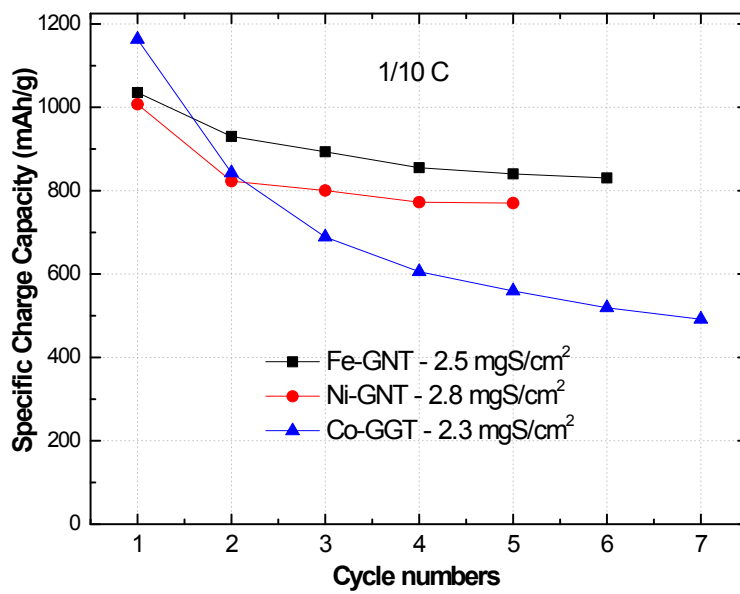

**Figure S15.** Short-term cyclic stability of M-GNT hosted S cathodes in Li-S batteries

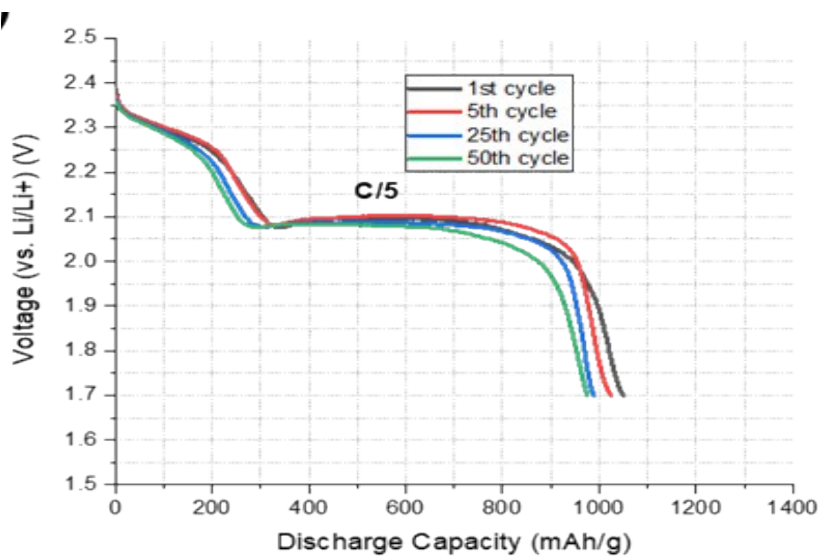

**Figure S16.** Discharge voltage profiles of 1<sup>st</sup>, 5<sup>th</sup>, 25<sup>th</sup>, and 50<sup>th</sup> cycles for S@FeCoNi-GNTs cells at C/5.

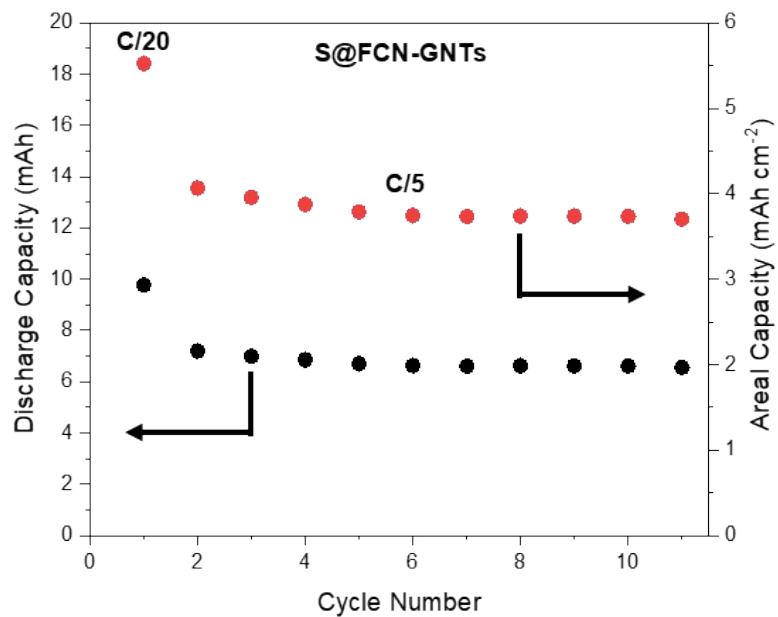

**Figure S17.** Cycle tests in specific capacity and areal capacity of ultra-high loading S@FCN-GNTs ( $\sim 4.5 \text{ mgS cm}^{-2}$ ), which discharged  $1234.7 \text{ mAh g}^{-1}$  ( $5.52 \text{ mAh cm}^{-2}$ ) at C/20 and  $909.0 \text{ mAh g}^{-1}$  ( $4.07 \text{ mAh cm}^{-2}$ ) at C/5.

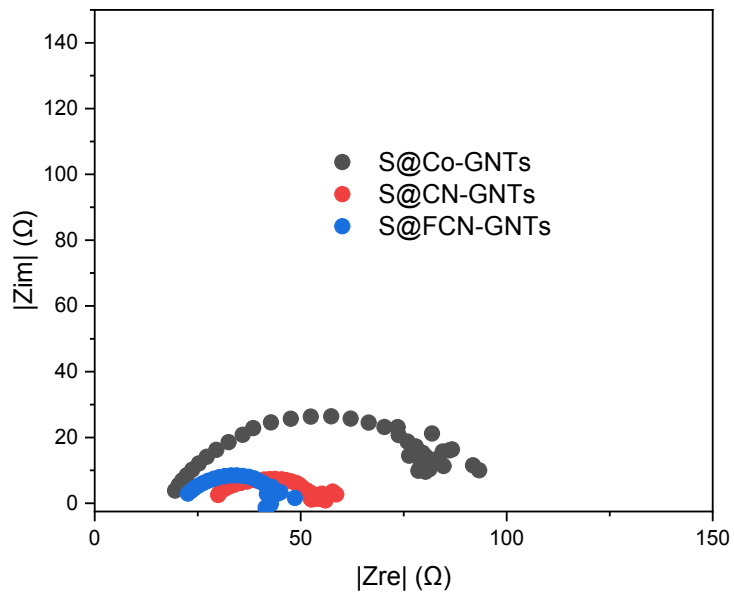

**Figure S18.** EIS of full Li-S cells with S@Co-GNTs, S@CN-GNTs, and S@FCN-GNTs materials after rate capability testing from 1.0 Hz to 100 kHz.



**Table S3.** A comparison of the S@FCN-GNTs material's cycle lifetime performance at 1C (this work) to other heteroatom-doped carbon nanostructures for Li-S batteries reported in the literature. (\* = 1600 mA g<sup>-1</sup>)

| <b>Carbon Morphology</b>                | <b>Doped Heteroatoms and Nanoparticles</b> | <b>Voltage Range (V)</b> | <b>Initial Performance at 1C (mAh g<sup>-1</sup>)</b> | <b>After (n) Cycles at 1C (mAh g<sup>-1</sup>)</b> | <b>Capacity loss per cycle (%)</b> |
|-----------------------------------------|--------------------------------------------|--------------------------|-------------------------------------------------------|----------------------------------------------------|------------------------------------|
| <b>This work (S@FCN-GNTs)</b>           | <b>N/O and Fe, Co, and Ni</b>              | <b>2.7 – 1.5</b>         | <b>956</b>                                            | <b>554 (500)</b>                                   | <b>0.0839</b>                      |
| Carbon nanosheets <sup>1</sup>          | N and Co                                   | 2.8 – 1.7                | 825                                                   | 633 (200)                                          | 0.0960                             |
| Carbon microclusters <sup>2</sup>       | N and Co                                   | 2.8 – 1.7                | 905                                                   | 650 (400)                                          | 0.0704                             |
| Hierarchical porous carbon <sup>3</sup> | N/P                                        | 2.8 – 1.7                | 614                                                   | 456 (500)                                          | 0.0514                             |
| Nonporous carbon <sup>4</sup>           | N/O                                        | 3.0 – 1.5                | 360*                                                  | 540 (300)*                                         | ---                                |

#### References:

1. S. Liu, J. Li, X. Yan, Q. Su, Y. Lu, J. Qiu, Z. Wang, X. Lin, J. Huang and R. Liu, *Advanced Materials*, 2018, **30**, 1706895.
2. P. Wang, Z. Zhang, X. Yan, M. Xu, Y. Chen, J. Li, J. Li, K. Zhang and Y. Lai, *Journal of Materials Chemistry A*, 2018, **6**, 14178-14187.
3. J. Cai, C. Wu, Y. Zhu, K. Zhang and P. K. Shen, *Journal of Power Sources*, 2017, **341**, 165-174.
4. K. Mi, S. Chen, B. Xi, S. Kai, Y. Jiang, J. Feng, Y. Qian and S. Xiong, *Advanced Functional Materials*, 2017, **27**, 1604265.
